# Supplementary material for: A rigid-flexible steric blocking strategy for highly bright and ultrawide piezochromism in the deep-red/near-infrared region
Source: Royal Society of Chemistry journal article supplement (doi:10.1039/d3tc03109h), 2023-01-01
Supplement: d3tc03109h1.pdf [file d3tc03109h1.pdf]

## Synthesis

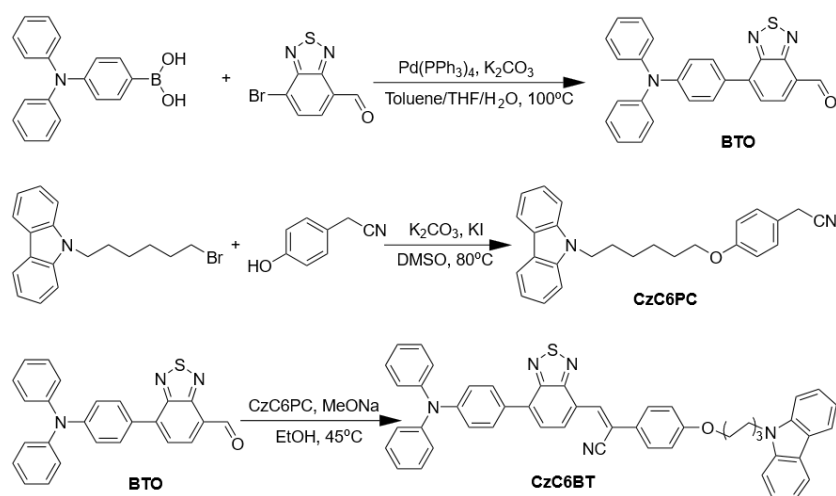

**Scheme S1** The synthetic route of **BTO**, **CzC6PC** and **CzC6BT**.

### 7-(4-(diphenylamino)phenyl)benzo[*c*][1,2,5]thiadiazole-4-carbaldehyde (**BTO**)

The intermediate 7-(4-(diphenylamino)phenyl)benzo[*c*][1,2,5]thiadiazole-4-carbaldehyde was synthesized by reference<sup>[1]</sup> to literature methods, (4-(diphenylamino)phenyl)boronic acid (1.74 g, 6 mmol), 7-bromobenzo[*c*][1,2,5]thiadiazole-4-carbaldehyde (1.22 g, 5 mmol), Tetrakis(triphenylphosphine)palladium (0.06 g, 0.05 mmol) and K<sub>2</sub>CO<sub>3</sub> (1.38 g, 10 mmol) were placed in a 250 mL round-bottom flask. The mixed solvent of toluene (25 mL), tetrahydrofuran (10 mL) and Water (2 mL) was added, and the mixture was vigorously stirred at 100 °C for 12 h under nitrogen. Water (30 mL) was added to quench the reaction, the mixture was then extracted with dichloromethane. The organic solution was extracted with dichloromethane (3 × 50 mL) followed by purification by column chromatography on silica gel with petroleum ether/dichloromethane (1: 1) as the eluent to offer a red powder. The desired compound was obtained in 83% yield (1.70 g). <sup>1</sup>H NMR (400 MHz, Chloroform-*d*) δ 10.75 (s, 1H), 8.27 (d, *J* = 7.4 Hz, 1H), 7.93 (dd, *J* = 8.6, 1.4 Hz, 2H), 7.83 (d, *J* = 7.4 Hz,

---

1H), 7.32 (t,  $J = 7.3$  Hz, 4H), 7.24 – 7.16 (m, 6H), 7.11 (t,  $J = 7.3$  Hz, 2H).

**2-(4-((6-(9H-carbazol-9-yl)hexyl)oxy)phenyl)acetonitrile  
(CzC6PC)**

The intermediate 2-(4-((6-(9H-carbazol-9-yl)hexyl)oxy)phenyl)acetonitrile was synthesized by reference<sup>[2]</sup> to literature methods, 9-(6-bromohexyl)-9H-carbazole (3.30 g, 10 mmol), K<sub>2</sub>CO<sub>3</sub> (1.38 g, 10 mmol) and KI (0.02 g, 0.15 mmol) were added to a solution of 4-hydroxyphenylacetonitrile (1.46 g, 11 mmol) in dry DMSO (40 mL) at room temperature. This mixture was stirred at 80 °C for overnight. After cooling to room temperature, the mixture was poured into water and extracted with ethyl acetate. The organic solution was extracted with ethyl acetate (3 × 50 mL) followed by purification by column chromatography on silica gel with petroleum ether/dichloromethane (4: 1) as the eluent to offer a white powder. The desired compound was obtained in 79% yield (3.02 g). <sup>1</sup>H NMR (400 MHz, Chloroform-*d*) δ 8.16 (d,  $J = 7.7$  Hz, 2H), 7.51 (t,  $J = 7.9$  Hz, 2H), 7.45 (d,  $J = 8.2$  Hz, 2H), 7.28 (t,  $J = 7.4$  Hz, 2H), 7.23 (d,  $J = 8.2$  Hz, 2H), 6.87 (dd,  $J = 8.4, 1.3$  Hz, 2H), 4.35 (t,  $J = 7.1$  Hz, 2H), 3.92 (td,  $J = 6.4, 1.1$  Hz, 2H), 1.95 (p,  $J = 7.2$  Hz, 2H), 1.77 (p,  $J = 6.6$  Hz, 2H), 1.60 – 1.42 (m, 4H).

**(Z)-2-(4-((6-(9H-carbazol-9-yl)hexyl)oxy)phenyl)-3-(7-(4-(diphenyl amino)phenyl)benzo[*c*][1,2,5]thiadiazol-4-yl)acrylonitrile (CzC6BT)**

A mixture of BTO (1.22 g, 3 mmol) and CzC6PC (1.34 g, 3.5 mmol) in ethanol (HPLC grade, 30 mL) was stirred at room temperature for 5 min. And then, NaOCH<sub>3</sub> (0.270 g, 5 mmol) was added and stirred for 30 min. Finally, the mixture was heated and stirred at 45 °C for 12 h. The resulting powder was filtered and repeatedly washed with EtOH (~50 mL) and followed by purification by column chromatography on silica gel with petroleum ether/dichloromethane (1: 1) as the eluent to offer a red powder (1.90 g, 82%). <sup>1</sup>H NMR (600 MHz, Chloroform-*d*) δ 8.68 (dd,  $J = 7.6, 0.8$  Hz, 1H), 8.42 (s, 1H), 8.12 (d,  $J = 7.7$  Hz, 2H), 7.92 (dt,  $J = 8.7, 2.6$  Hz,

2H), 7.81 (d,  $J = 7.6$  Hz, 1H), 7.73 (dt,  $J = 8.9, 3.3$  Hz, 2H), 7.47 (td,  $J = 8.2, 0.9$  Hz, 2H), 7.43 (d,  $J = 8.2$  Hz, 2H), 7.31 (t,  $J = 8.4$  Hz, 4H), 7.24 (dd,  $J = 7.7, 1.0$  Hz, 2H), 7.22 – 7.19 (m, 6H), 7.09 (td,  $J = 7.3, 1.2$  Hz, 2H), 6.94 (dt,  $J = 8.8, 3.3$  Hz, 2H), 4.35 (t,  $J = 7.1$  Hz, 2H), 3.97 (t,  $J = 6.4$  Hz, 2H), 1.94 (p,  $J = 7.2$  Hz, 2H), 1.78 (p,  $J = 6.5$  Hz, 2H), 1.53 (p,  $J = 15.1, 7.5$  Hz, 2H), 1.48 (p,  $J = 6.9, 6.2$  Hz, 2H).  $^{13}\text{C}$  NMR (101 MHz, Chloroform-*d*)  $\delta = 159.23, 154.05, 146.24, 139.39, 132.10, 129.07, 128.41, 126.57, 125.96, 125.57, 124.59, 124.20, 124.14, 122.60, 121.81, 121.40, 119.36, 117.75, 114.00, 111.30, 107.59, 76.31, 75.99, 75.67, 66.94, 41.91, 27.99, 27.92, 26.04, 24.89$ . ESI-MS  $m/z$ : Found 772.3062  $[\text{M}]^+$ ; ion formula  $\text{C}_{51}\text{H}_{42}\text{N}_5\text{OS}^+$  requires 772.3110  $[\text{M}]^+$ ; Elemental analysis given N: 8.99%; C: 79.34%; H: 5.39%; S: 4.41%; Molecular formula  $\text{C}_{51}\text{H}_{41}\text{N}_5\text{OS}$  requires N: 9.07%; C: 79.35%; H: 5.35%; S: 4.15%.

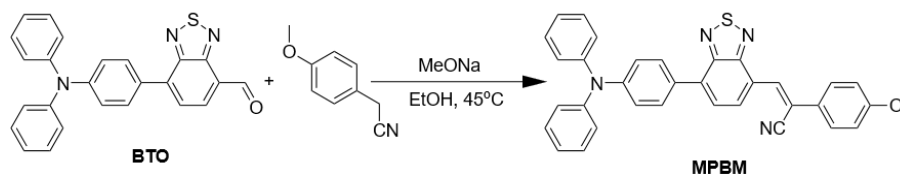

**Scheme S2** The synthetic route of **MPBM**.

**(Z)-3-(7-(4-(diphenylamino)phenyl)benzo[*c*][1,2,5]thiadiazol-4-yl)-2-(4-methoxyphenyl)acrylonitrile (MPBM)**

A mixture of BTO (0.815 g, 2 mmol) and 2-(4-methoxyphenyl)acetonitrile (0.441 g, 3 mmol) in methanol (20 mL) was stirred at room temperature for 5 min. And then,  $\text{NaOCH}_3$  (0.216 g, 4 mmol) was added and stirred for 30 min. Finally, the mixture was heated and stirred at 45 °C for 12 h. The resulting powder was filtered and repeatedly washed with EtOH (~50 mL) and followed by purification by column chromatography on silica gel with petroleum ether/dichloromethane (1: 1) as the eluent to offer a red powder (0.823 g, 77%).  $^1\text{H}$  NMR (400 MHz, Chloroform-*d*)  $\delta$  8.70 (dd,  $J = 7.7, 0.9$  Hz, 1H), 8.45 (s, 1H), 7.94 (dt,  $J = 8.8, 2.8$  Hz, 2H), 7.84 (d,  $J = 7.6$  Hz, 1H), 7.79

(dt,  $J = 8.9, 3.1$  Hz, 2H), 7.33 (td,  $J = 8.2, 1.9$  Hz, 5H), 7.26 – 7.19 (m, 6H), 7.11 (td,  $J = 7.4, 0.9$  Hz, 2H), 7.03 (dt,  $J = 8.9, 1.9$  Hz, 2H), 3.91 (s, 3H).  $^{13}\text{C}$  NMR (101 MHz, Chloroform-*d*)  $\delta$  153.16, 148.66, 147.28, 135.20, 133.25, 130.11, 129.98, 129.45, 127.73, 127.64, 126.97, 126.80, 125.19, 123.64, 122.42, 118.30, 114.58, 112.28, 55.51. ESI-MS  $m/z$ : Found 537.1734  $[\text{M}]^+$ ; ion formula  $\text{C}_{34}\text{H}_{25}\text{N}_4\text{OS}^+$  requires 537.1749  $[\text{M}]^+$ . Elemental analysis given N: 10.26%; C: 75.85%; H: 4.54%; S: 6.38%; Molecular formula  $\text{C}_{34}\text{H}_{24}\text{N}_4\text{OS}$  requires N: 10.44%; C: 76.10%; H: 4.51%; S: 5.97%.

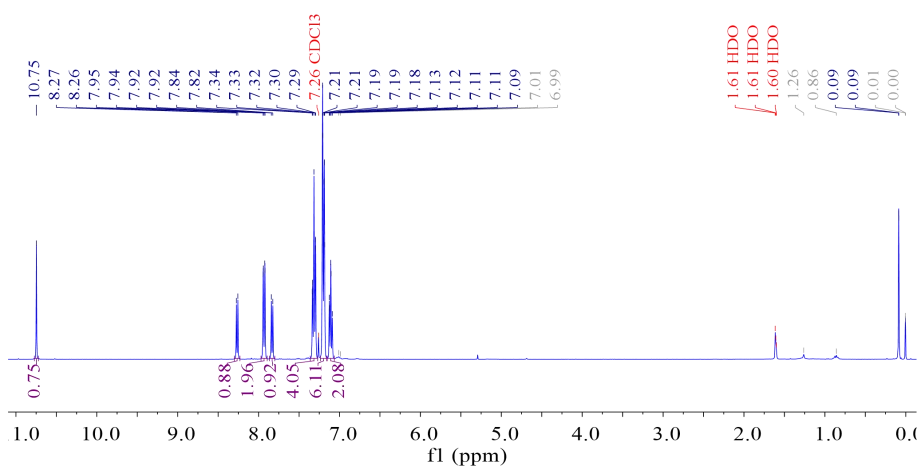

**Fig. S1**  $^1\text{H}$ -NMR spectra of **BTO**.

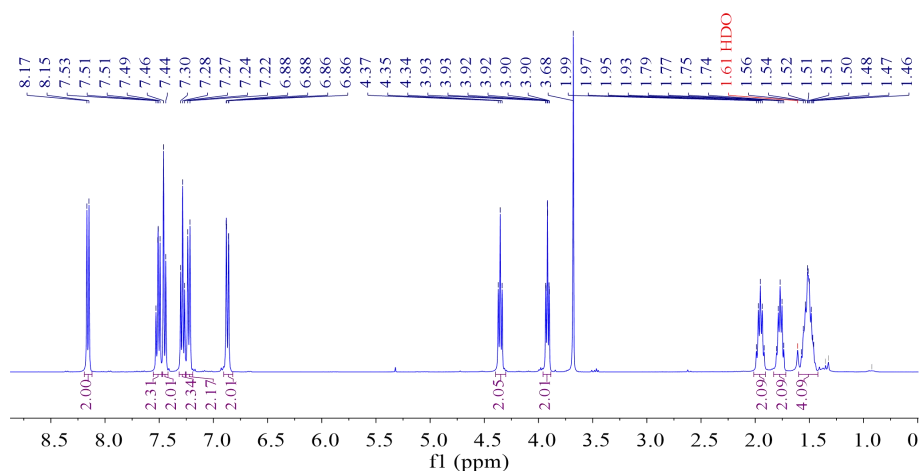

**Fig. S2**  $^1\text{H}$ -NMR spectra of **CzC6PC**.

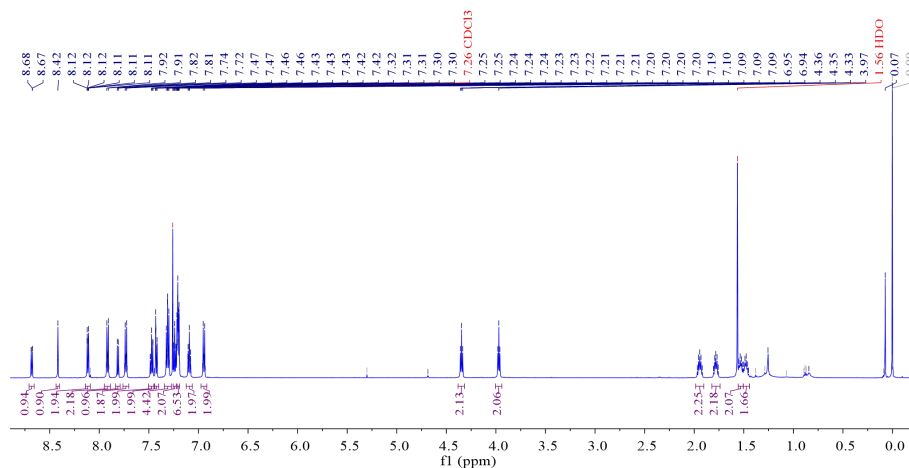

Fig. S3 <sup>1</sup>H-NMR spectra of CzC6BT.

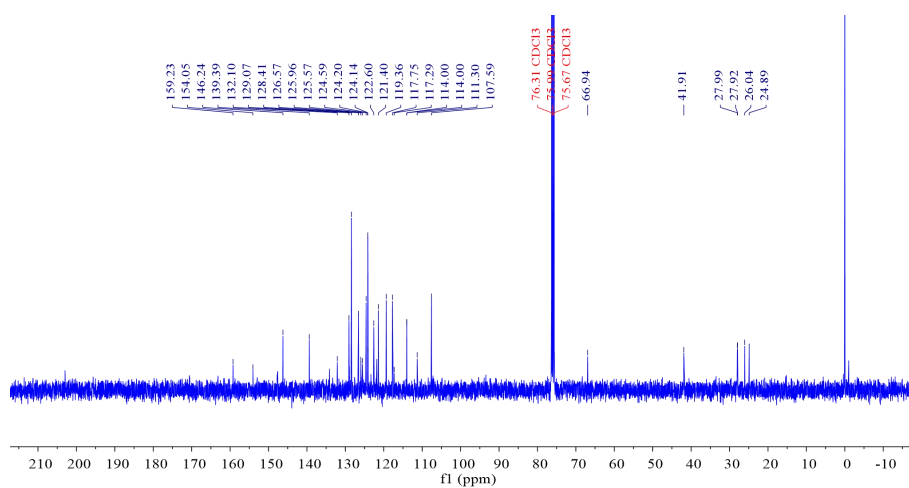

Fig. S4 <sup>13</sup>C-NMR spectra of CzC6BT.

| Formula                                           | Ion Formula         | Calc. m/z | m/z      | Diff(ppm) |
|---------------------------------------------------|---------------------|-----------|----------|-----------|
| C <sub>51</sub> H <sub>40</sub> N <sub>5</sub> OS | [M+H] <sup>+</sup>  | 772.3110  | 772.3062 | 6.2       |
| C <sub>51</sub> H <sub>40</sub> N <sub>5</sub> OS | [M+Na] <sup>+</sup> | 794.2930  | 794.2914 | 2.0       |

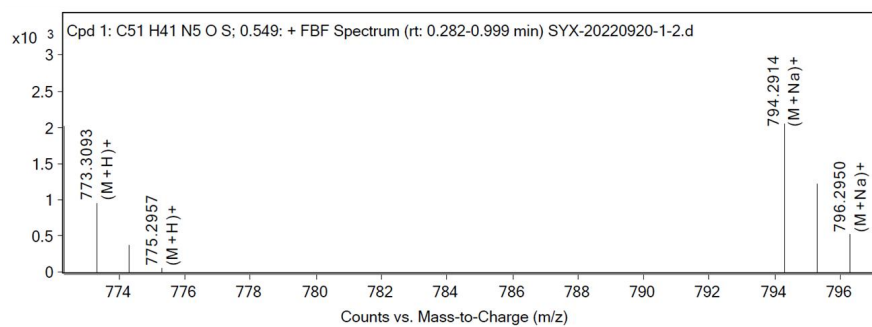

Fig. S5 ESI-MS spectrum of CzC6BT.

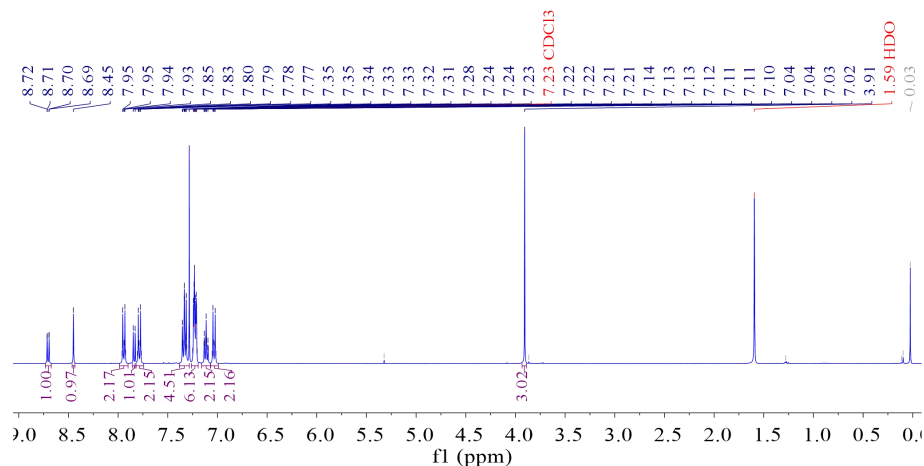

**Fig. S6**  $^1\text{H}$ -NMR spectra of MPBM.

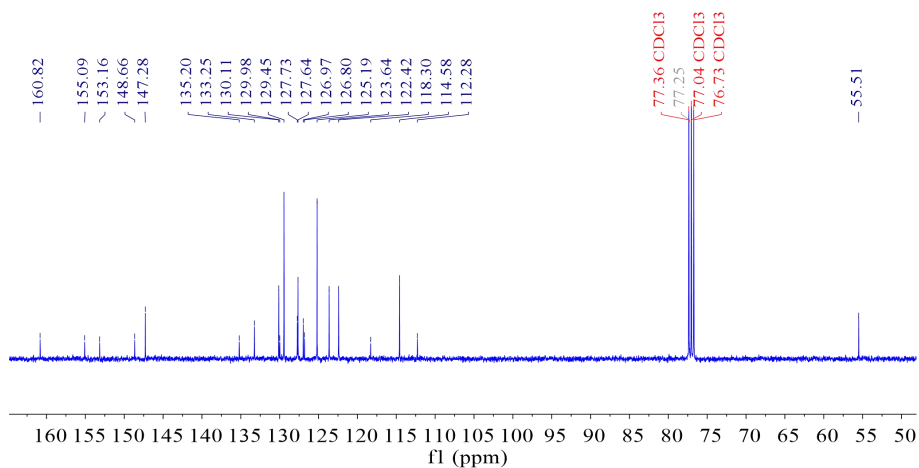

**Fig. S7**  $^{13}\text{C}$ -NMR spectra of MPBM.

| Formula                                         | Ion Formula              | Calc. m/z | m/z      | Diff(ppm) |
|-------------------------------------------------|--------------------------|-----------|----------|-----------|
| $\text{C}_{34}\text{H}_{24}\text{N}_4\text{OS}$ | $[\text{M}+\text{H}]^+$  | 537.1749  | 537.1734 | 2.8       |
| $\text{C}_{34}\text{H}_{24}\text{N}_4\text{OS}$ | $[\text{M}+\text{Na}]^+$ | 559.1568  | 559.1549 | 3.4       |

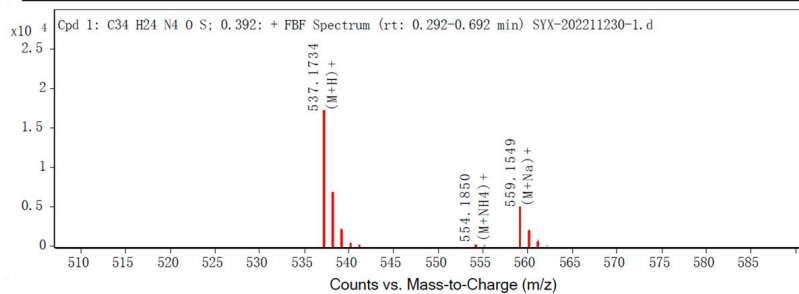

**Fig. S8** ESI-MS spectrum of MPBM.

The change in magnitude of the dipole moment between the ground and excited states, that is,  $\Delta\mu = |\mu_e - \mu_g|$  can be estimated using the Lippert–Mataga equation

$$hc(v_a - v_f) = hc(v_a^0 - v_f^0) + \frac{2(\mu_e - \mu_g)^2}{a_0^3} f(\varepsilon, n)$$

Where  $a_0$  is the cavity radius in which the solute resides, estimated to be 7.21 Å.  $\mu_g$  is the ground-state dipole moment, estimated to be 1.00 D (B3LYP at the basis set level of 6-31G(d, p)),  $\mu_e$  is the excited state dipole moment.  $h$  and  $c$  are Planck's constant and the speed of light, respectively, and  $f(\varepsilon, n)$  is the orientation polarizability, defined as

$$f(\varepsilon, n) = \frac{\varepsilon - 1}{2\varepsilon + 1} - \frac{n^2 - 1}{2n^2 + 1}$$

Where  $\varepsilon$  is the static dielectric constant and  $n$  is the optical refractivity index of the solvent. Through the analysis of the fitted line in solvents, its corresponding  $\mu_e$  was calculated to be 21.1 D with the slope of 15032 according to Lippert-Mataga equation.

**Table S1** Detailed photo-physical data of **CzC6BT** in the different solvents.

| Solvents              | $f$   | $\lambda_{abs}$<br>nm | $\lambda_{flu}$<br>nm | $\nu_a$<br>cm <sup>-1</sup> | $\nu_f$<br>cm <sup>-1</sup> | $\nu_a - \nu_f$<br>cm <sup>-1</sup> | PLQY  |
|-----------------------|-------|-----------------------|-----------------------|-----------------------------|-----------------------------|-------------------------------------|-------|
| Hexane (Hex)          | 0     | 485                   | 567                   | 20619                       | 17637                       | 2982                                | 1     |
| Butyl ether (NBE)     | 0.096 | 491                   | 595                   | 20367                       | 16806                       | 3559                                | 0.973 |
| Isopropyl ether (IPE) | 0.145 | 488                   | 607                   | 20491                       | 16474                       | 4017                                | 0.956 |
| Ethyl ether (DEE)     | 0.167 | 482                   | 624                   | 20747                       | 16026                       | 4721                                | 0.894 |
| Ethyl acetate (EA)    | 0.200 | 477                   | 654                   | 20964                       | 15291                       | 5674                                | 0.718 |
| Tetrahydrofuran (THF) | 0.210 | 482                   | 662                   | 20747                       | 15106                       | 5641                                | 0.743 |
| Dichloromethane (DCM) | 0.218 | 483                   | 670                   | 20704                       | 14925                       | 5779                                | 0.656 |
| Acetone (CP)          | 0.284 | 475                   | 695                   | 21053                       | 14388                       | 6664                                | 0.105 |
| Acetonitrile (ACN)    | 0.305 | 467                   | 722                   | 21413                       | 13850                       | 7562                                | 0.037 |

**Table S2** Optical properties of **CzC6BT** in different states.

|             | Peak (nm) | $\phi_F$ (%) | $\tau^a$ (ns) | $k_f^b$ ( $10^7$ s <sup>-1</sup> ) | $k_{nf}^c$ ( $10^7$ s <sup>-1</sup> ) |
|-------------|-----------|--------------|---------------|------------------------------------|---------------------------------------|
| Crystal-a   | 680       | 40.1         | 4.38          | 9.16                               | 13.68                                 |
| Crystal-b   | 670       | 21.0         | 2.48          | 8.47                               | 31.85                                 |
| Molten      | 690       | 48.5         | 3.92          | 12.37                              | 13.14                                 |
| Spin-coated | 640       | 20.0         | 2.36          | 8.47                               | 33.90                                 |

<sup>a</sup>  $\tau$  = the mean lifetime;

<sup>b</sup> fluorescent rate constant  $k_f = \phi_F / \tau$ ;

<sup>c</sup> non-fluorescent rate constant  $k_{nf} = 1/\tau - k_f$ .

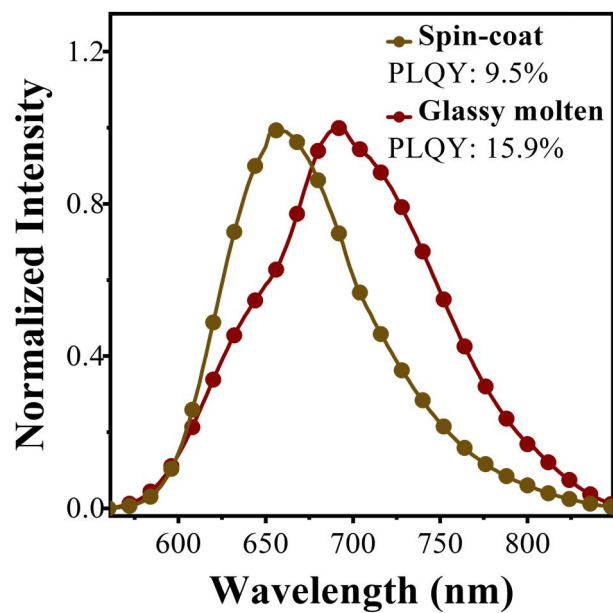

**Fig. S9** PL spectra of MPBM in spin-coat film and molten film states.

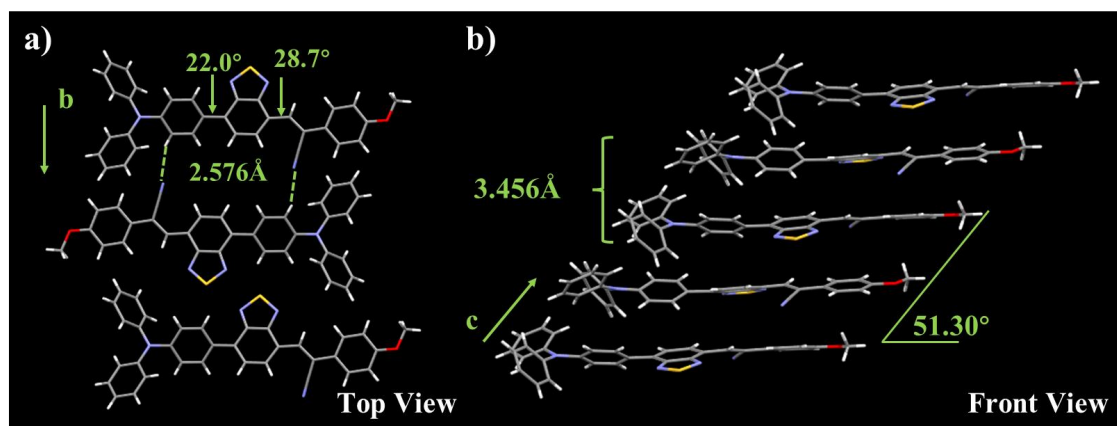

**Fig. S10** Crystal structures of MPBM: a) the torsion angles and the illustration of C–H...N hydrogen bond interactions of the MPBM in the crystalline state and b) the front view of the parallel arrangement.



**Table S3** Crystal data and structure refinement for **Crystal-a**, **Crystal-b**, and **MPBM**.

| Samples                                                     | Crystal-a<br>(CCDC: 2222362) | Crystal-b<br>(CCDC: 2222364) | MPBM<br>(CCDC:2225943) |
|-------------------------------------------------------------|------------------------------|------------------------------|------------------------|
| Formula                                                     | C51H41N5S                    | C51H41N5S                    | C34H24N4O8             |
| Mr                                                          | 771.95                       | 771.95                       | 536.63                 |
| Temperature(K)                                              | 272                          | 271                          | 273                    |
| Crystal system                                              | monoclinic                   | triclinic                    | monoclinic             |
| Space group                                                 | Cc                           | P-1                          | P 21/c                 |
| <i>a</i> (Å)                                                | 37.963(10)                   | 10.2793(16)                  | 17.498(11)             |
| <i>b</i> (Å)                                                | 11.197(3)                    | 13.021(4)                    | 15.363(7)              |
| <i>c</i> (Å)                                                | 19.378(2)                    | 17.825(5)                    | 10.416(3)              |
| $\alpha(^{\circ})$                                          | 90                           | 102.094(13)                  | 90                     |
| $\beta(^{\circ})$                                           | 100.514(12)                  | 99.856(13)                   | 106.58(3)              |
| $\gamma(^{\circ})$                                          | 90                           | 105.936(12)                  | 90                     |
| <i>V</i> (Å <sup>3</sup> )                                  | 8099(3)                      | 2716.1(10)                   | 2684(2)                |
| <i>Z</i>                                                    | 8                            | 2                            | 4                      |
| <i>D</i> <sub>calc</sub> (g/cm <sup>3</sup> )               | 1.266                        | 1.178                        | 1.328                  |
| Theta Range( $^{\circ}$ )                                   | 2.367–68.501                 | 2.613–68.379                 | 2.635–68.447           |
| <i>F</i> (000)                                              | 3248.0                       | 812.0                        | 1120                   |
| <i>h</i> , <i>k</i> , <i>l</i> <sub>max</sub>               | 45, 13, 22                   | 12, 15, 21                   | 21, 18, 12             |
| <i>N</i> <sub>ref</sub>                                     | 12544                        | 27454                        | 4870                   |
| <i>T</i> <sub>min</sub> : <i>T</i> <sub>max</sub>           | 0.571, 0.753                 | 0.647, 0.753                 | 0.554, 0.753           |
| Independent reflections                                     | 12544                        | 7983                         | 4870                   |
| Goodness-of-fit on <i>F</i> <sub>2</sub>                    | 1.001                        | 1.016                        | 1.049                  |
| <i>R</i> <sub>int</sub>                                     | 0.0767                       | 0.0618                       | 0.1001                 |
| <i>R</i> <sub>I</sub> [ <i>I</i> >2 $\sigma$ ( <i>I</i> )]  | 0.0520                       | 0.0612                       | 0.084                  |
| <i>wR</i> <sub>2</sub> [ <i>I</i> >2 $\sigma$ ( <i>I</i> )] | 0.1223                       | 0.1542                       | 0.2332                 |
| <i>R</i> <sub>I</sub> (all data)                            | 0.0815                       | 0.1103                       | 0.1464                 |
| <i>wR</i> <sub>2</sub> (all data)                           | 0.1535                       | 0.1855                       | 0.2741                 |
| <i>S</i>                                                    | 1.001                        | 1.016                        | 1.049                  |

$$R_1 = \frac{\sum ||F_o| - |F_c||}{\sum |F_o|}, \quad wR_2 = [\frac{\sum w(F_o^2 - F_c^2)^2}{\sum w(F_o^2)^2}]^{1/2}$$

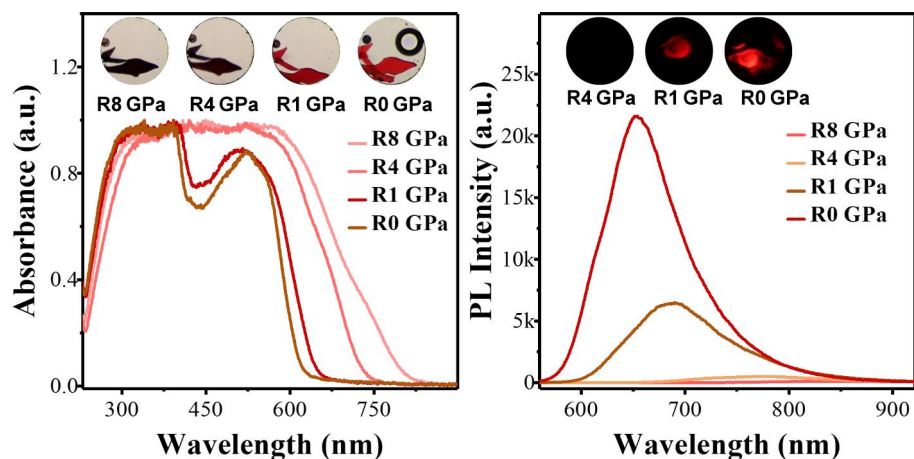

**Fig. S11** a) *In situ* absorption spectra and b) PL spectra of **Crystal-a** during the depressurizing process. The inset images show normal and fluorescent photographs respectively under different pressures.

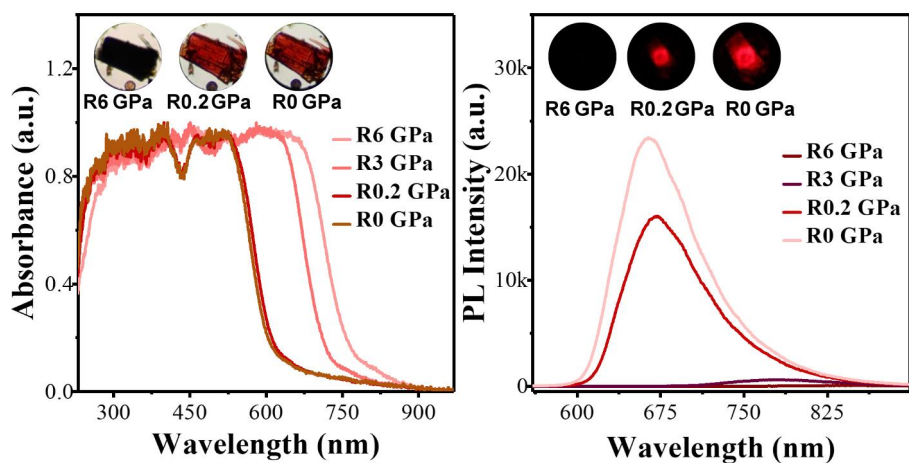

**Fig. S12** a) *In situ* absorption spectra and b) PL spectra of **Crystal-b** during the depressurizing process. The inset images show normal and fluorescent photographs respectively under different pressures.

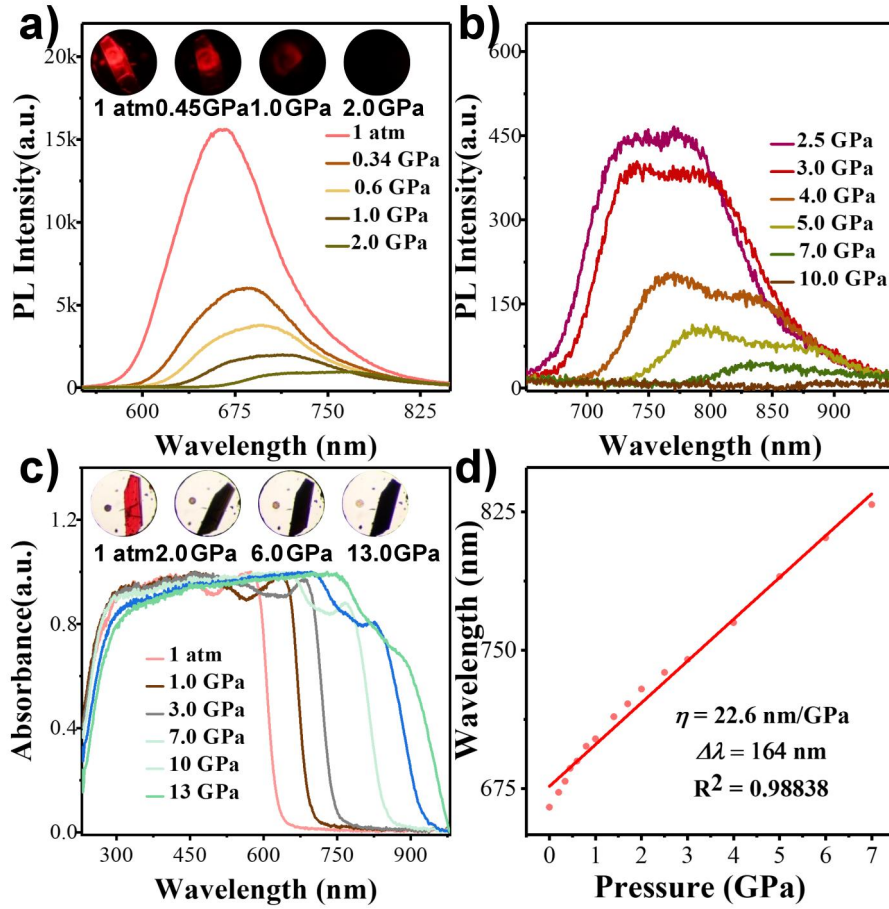

**Fig. S13** a, b) *In situ* PL spectra and c) absorption spectra of MPBM under different hydrostatic pressures; d) The corresponding plots of the hydrostatic pressure versus PL peaks wavelength. The inset images of a, c) show the fluorescent and normal photographs respectively under different pressures.

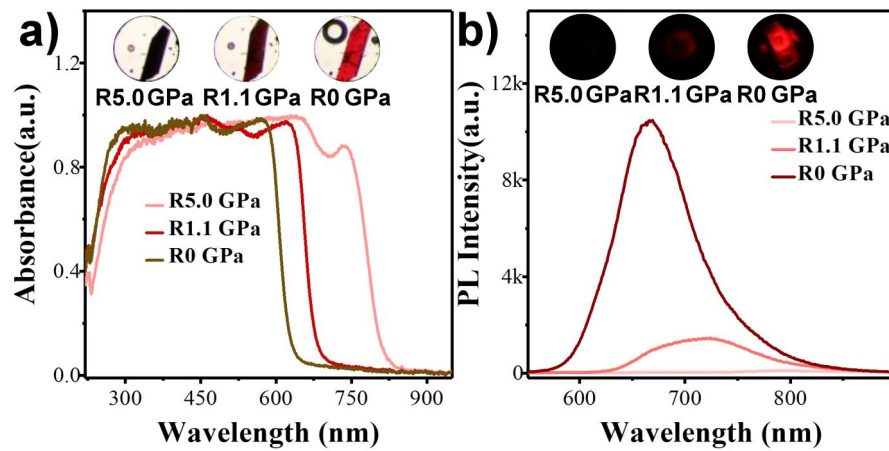

**Fig. S14** a) *In situ* absorption spectra and b) PL spectra of MPBM during the

depressurizing process. The inset images show the normal and fluorescent photographs respectively under different pressures.

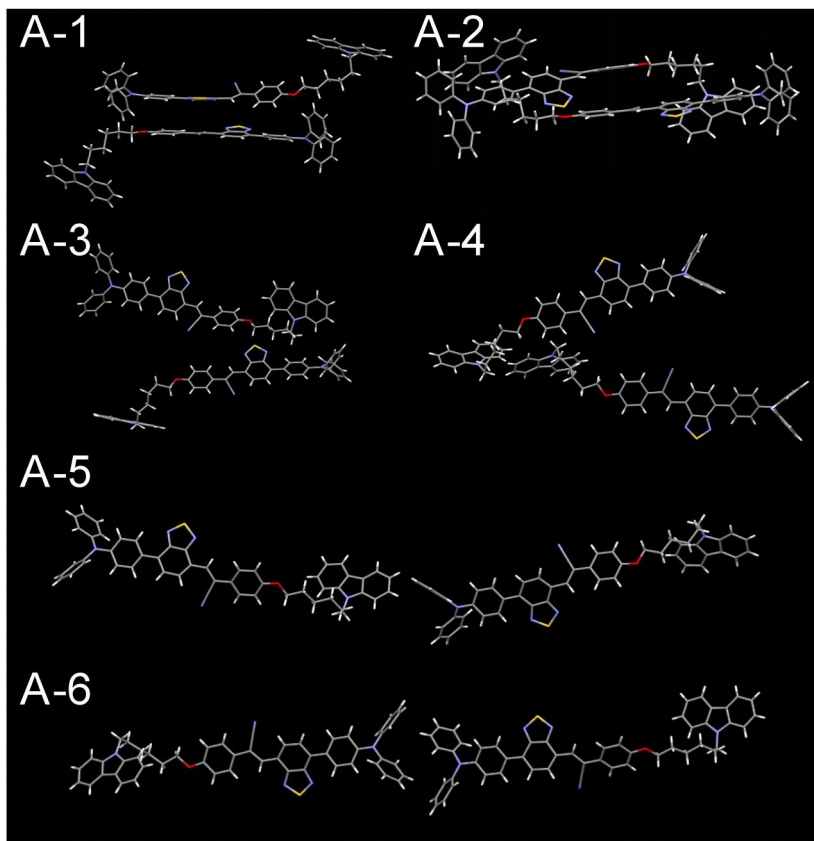

**Fig. S15** Interacting dimers may be present in the Crystals-a.

**Table S4** DFT at the B3LYP/6-31G (d, p) level calculations of excited states of dimers and monomer in Crystals-a.

|                | Energy <sup>a</sup> (eV) | Wavelength (nm) | $f^b$  |
|----------------|--------------------------|-----------------|--------|
| <b>A-1</b>     | 1.945                    | 637.47          | 0.0654 |
| <b>A-2</b>     | 2.0337                   | 609.65          | 1.1029 |
| <b>A-3</b>     | 2.0323                   | 610.06          | 0.0005 |
| <b>A-4</b>     | 2.1008                   | 590.16          | 0.3738 |
| <b>A-5</b>     | 2.1306                   | 581.92          | 1.2833 |
| <b>A-6</b>     | 2.1166                   | 585.76          | 1.6625 |
| <b>monomer</b> | 2.1342                   | 580.94          | 0.6958 |

<sup>a</sup> excitation energies for different configurations;

<sup>b</sup>  $f$  is oscillator strength.

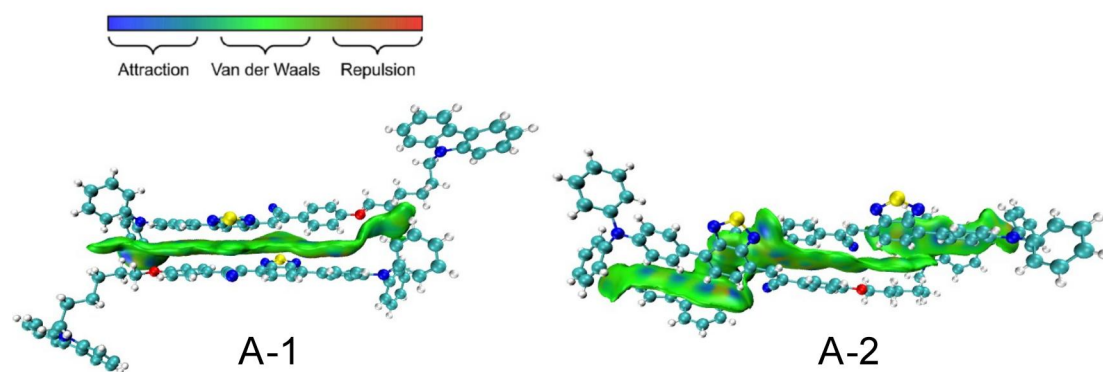

**Fig. S16** Visualization of intermolecular interactions for A-1 and A-2 phases, respectively, predicted by the IGM method.

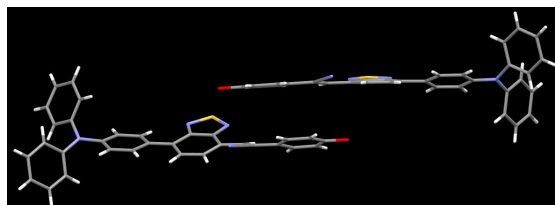

**Fig. S17** A-X dimer from A-2 dimer by cut-off alkyl carbazole.

**Table S5** Interaction energy decomposition of the A-1, A-2 and A-X dimers, respectively, calculated based on the EDA method, where energies are in kJ/mol.

|            | <b>Electrostatic</b> | <b>Repulsion</b> | <b>Dispersion</b> | <b>Total</b> |
|------------|----------------------|------------------|-------------------|--------------|
| <b>A-1</b> | -1.31                | 72.05            | -192.40           | -121.66      |
| <b>A-2</b> | -23.65               | 74.37            | -221.64           | -170.92      |
| <b>A-X</b> | -4.67                | 42.67            | -104.87           | -66.97       |

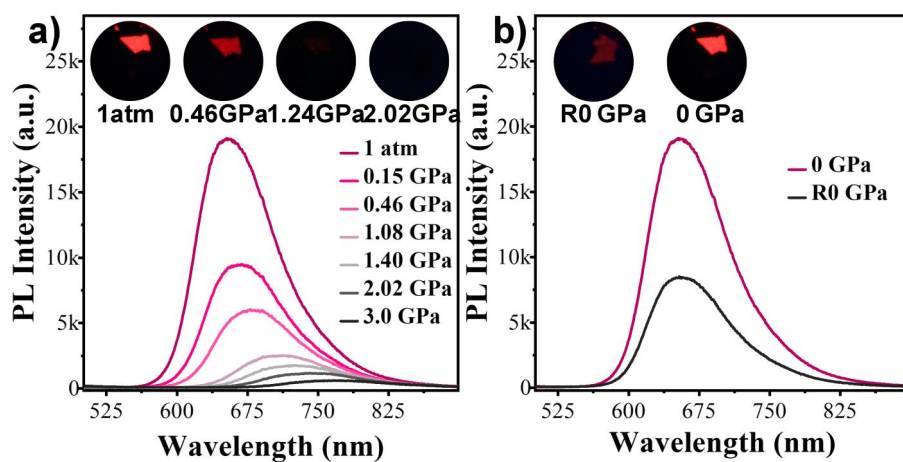

**Fig. S18** a, b) *In situ* PL spectra of MPBM-Cz3 under different hydrostatic pressures. R for release pressure.

## References

- [1] Q. Luo, L. Li, H. Ma, C. Lv, X. Jiang, X. Gu, Z. An, Z. Bo, C. Zhang and Y. Zhang, *Chem. Sci.* 2020, **11**, 6020-6025.
- [2] J. Sun, S. Yang, J. Wu, X. He, Y. Zhang, J. Ji, C. Zhang and Z. Liang, *Chem. Eng. J.* 2022, **428**, 132625.
